# Supplementary material for: Estrogen Receptor Status Oppositely Modifies Breast Cancer Prognosis in BRCA1/BRCA2 Mutation Carriers Versus Non-Carriers
Source: PubMed Central journal article supplement (PMC6627684; doi:10.3390/cancers11060738), 2019-05-28
Supplement: cancers-11-00738-s001.pdf [file cancers-11-00738-s001.pdf]

# Supplementary Materials: Estrogen Receptor Status Oppositely Modifies Breast Cancer Prognosis in *BRCA1/BRCA2* Mutation Carriers Versus Non-Carriers

Michal Vocka, Martina Zimovjanova, Zuzana Bielcikova, Petra Tesarova, Lubos Petruzela, Martin Mateju, Ludmila Krizova, Jaroslav Kotlas, Jana Soukupova, Marketa Janatova, Petra Zemankova, Petra Kleiblova, Jan Novotny, Bohuslav Konopasek, Martina Chodacka, Milan Brychta, Marek Sochor, Denisa Smejkalova-Musilova, Vlastimila Cmejlova, Renata Kozevnikovova, Lenka Miskarova, Sonja Argalacsova, Lenka Stolarova, Klara Lhotova, Marianna Borecka and Zdenek Kleibl

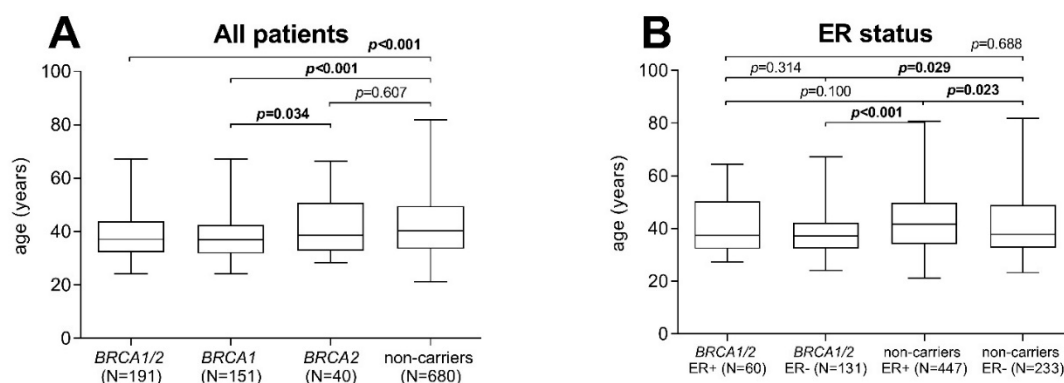

**Figure S1.** Differences in the age at diagnosis in mutation carriers and non-carriers in particular breast cancer subtypes; (A) distribution according to the mutation status; (B) distribution according to the mutation status and ER status.

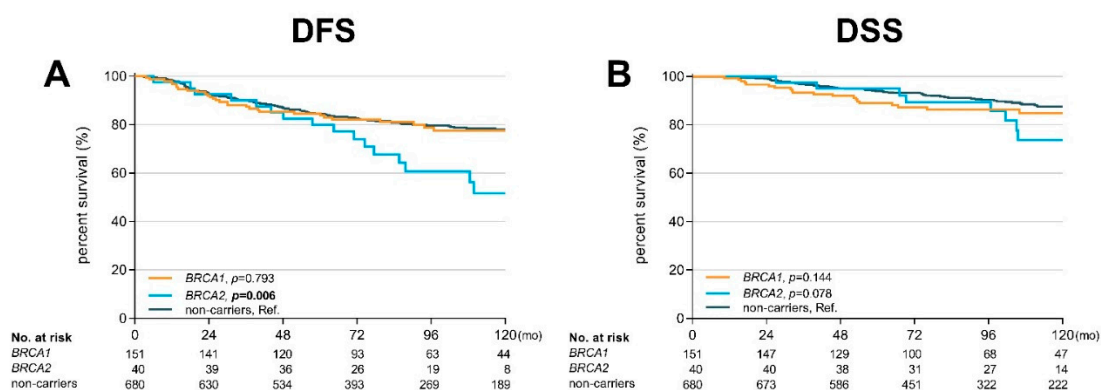

**Figure S2.** Kaplan–Meier plots showing DFS (A) and DSS (B) in *BRCA1* mutation carriers, *BRCA2* mutation carriers, and non-carriers.

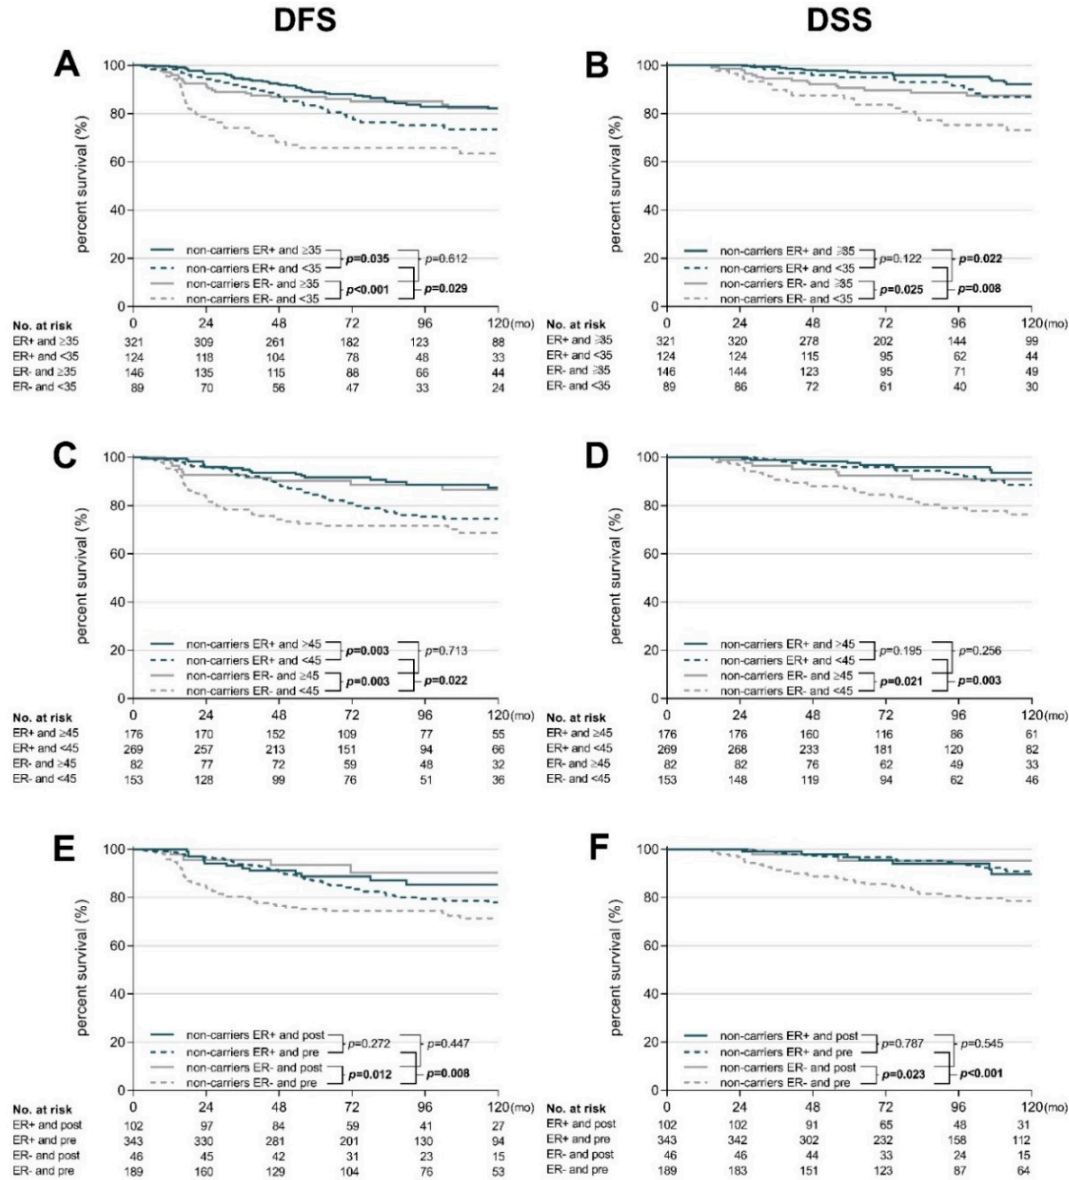

**Figure S3.** Kaplan–Meier plots of DFS and DSS in *BRCA1/2* mutations non-carriers considering a combined impact of ER-status and age of onset (**A**, **B** <35 vs. ≥35; **C**, **D** <45 vs. ≥45) or menopausal status (**E**, **F**) on survival. (**A**) ER-negative patients diagnosed at <35 years were at higher risk of recurrence (HR 2.61 [95%CI 1.49–4.56]) than ER-negative women diagnosed at ≥35 years. These high-risk ER-negative young patients (diagnosed at <35 years) were also at higher risk (HR 1.79 [95%CI 1.06–3.02]) than ER-positive young women diagnosed at the same age. (**B**) ER-negative patients diagnosed at <35 years were at higher risk of BC-related death than ER-negative women diagnosed at ≥35 years (HR 2.17 [95%CI 1.10–4.25]) and also than ER-positive young women diagnosed at the same age (HR 2.61 [95%CI 1.29–5.30]). (**C**) ER-negative patients diagnosed at <45 years were at higher risk of recurrence than ER-negative women diagnosed at ≥45 years (HR 2.29 [95%CI 1.32–3.98]) and also than ER-positive young women diagnosed at the same age (HR 1.63 [95%CI 1.07–2.47]). (**D**) ER-negative patients diagnosed at <45 years were at higher risk of BC-related death than ER-negative women diagnosed at ≥45 years (HR 2.22 [95%CI 1.13–4.35]) and also than ER-positive young women diagnosed at the same age (HR 3.00 [95%CI 1.67–5.42]). (**E**) Besides, ER-negative premenopausal patients were at higher risk than ER-negative postmenopausal patients (HR 2.31 [95%CI 1.20–4.42]) and ER-positive premenopausal patients (HR 1.71 [95%CI 1.15–2.53]). (**F**) ER-negative premenopausal patients were at higher risk than ER-negative postmenopausal patients (HR 2.53 [95%CI 1.14–5.66]) and ER-positive premenopausal patients (HR 3.36 [95%CI 1.93–5.87]).

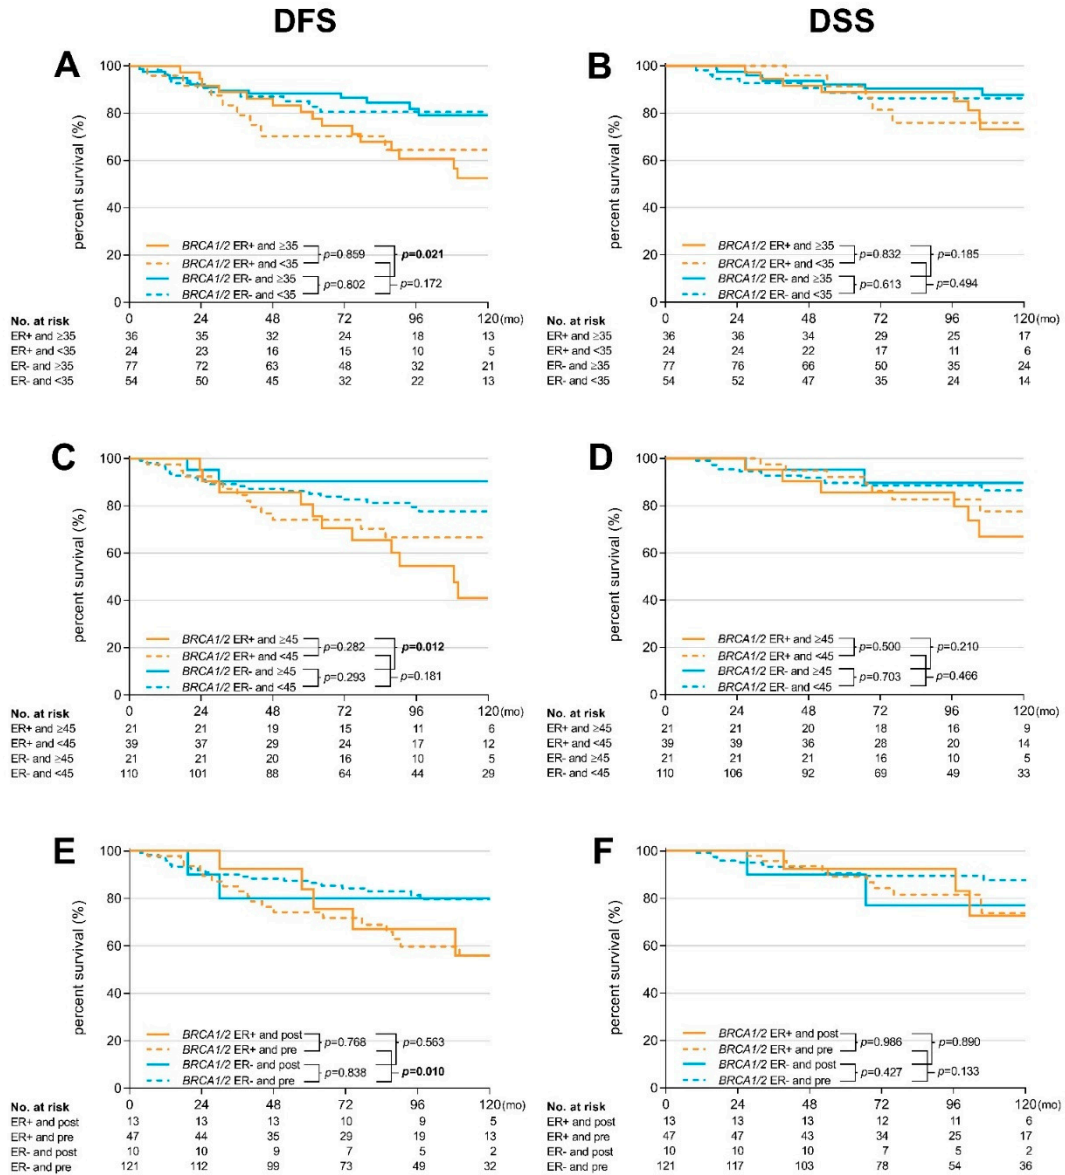

**Figure S4.** Kaplan–Meier plots of DFS and DSS in *BRCA1/2* mutation carriers considering a combined impact of ER-status and age of onset (A, B <35 vs. ≥35; C, D <45 vs. ≥45) or menopausal status (E, F) on survival. (A) Patients diagnosed at ≥35 years with ER-positive tumors showed a significantly increased risk of BC recurrence (HR 2.53 [95%CI 1.15–5.57]), compared with ER-negative mutation carriers of the same age. (B) Risk of BC-related death in ER-positive patients diagnosed at ≥35 years did not significantly differ from ER-negative women diagnosed at ≥35 years (HR 2.01 [95%CI 0.72–5.66]). (C) Increased risk of BC recurrence was shown for ER-positive patients ≥45 years (HR 4.03 [95%CI 1.36–12.00]), compared with ER-negative patients of the same age. (D) Risk of BC-related death in ER-positive patients diagnosed at ≥45 years did not significantly differ from ER-negative women diagnosed at ≥45 years (HR 2.44 [95%CI 0.60–9.85]). (E) ER-positive postmenopausal patients were at similar risk of BC recurrence as ER-negative postmenopausal patients (HR 1.57 [95%CI 0.34–7.15]). (F) Risk of BC-related death in ER-positive postmenopausal patients did not significantly differ from ER-negative postmenopausal patients (HR 0.88 [95%CI 0.14–5.46]).

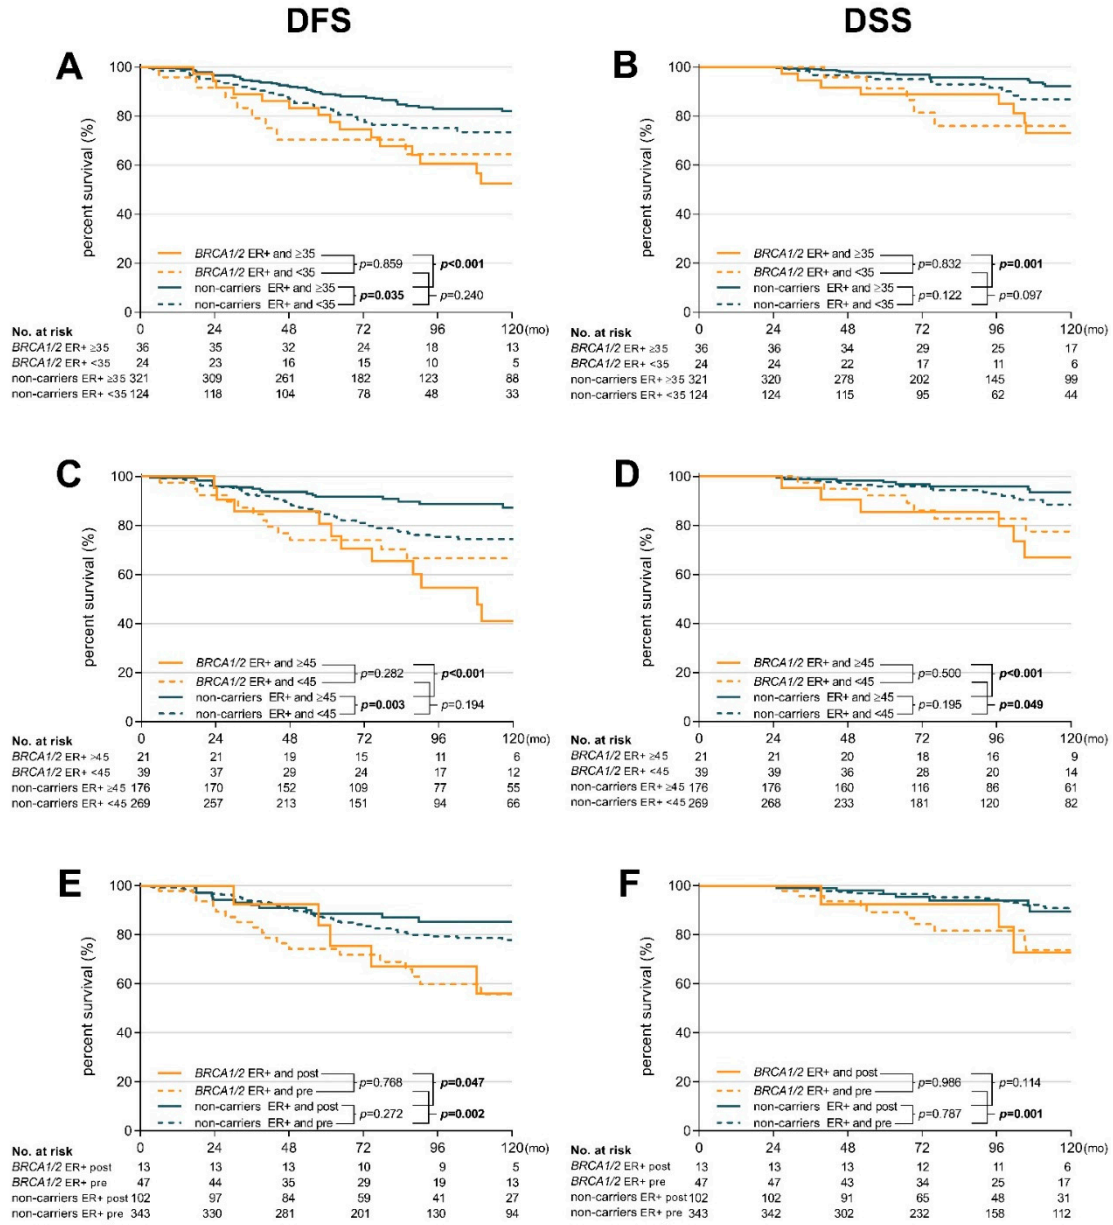

Figure S5. Cont.

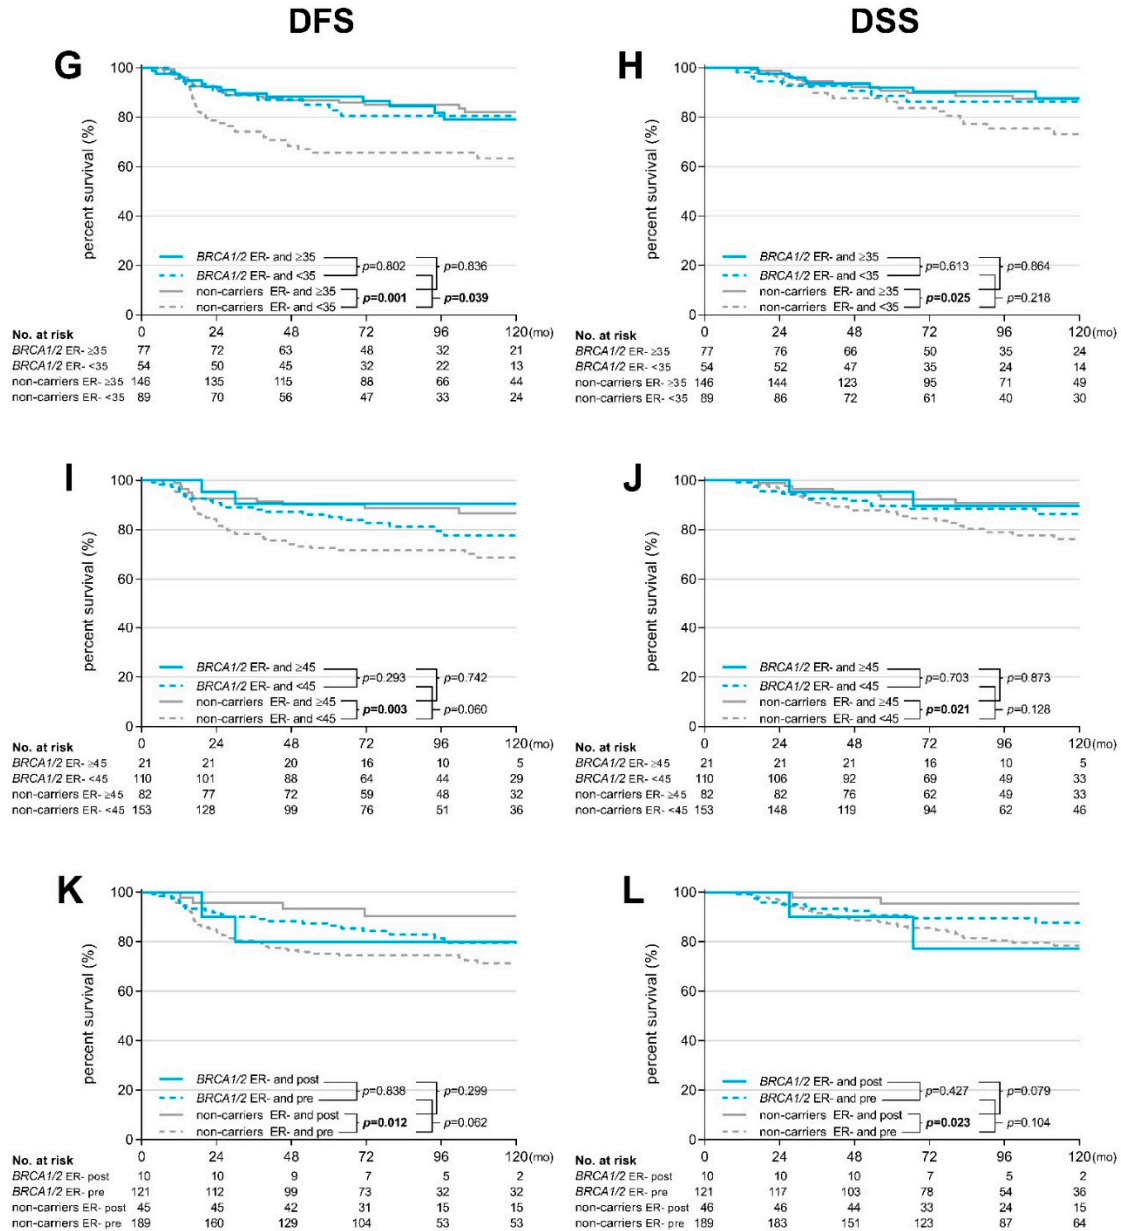

**Figure S5.** Kaplan-Meier plots of DFS and DSS in *BRCA1/2* mutation carriers and non-carriers considering a combined effect of ER-positivity (A–F) or ER-negativity (G–L) and age of disease onset or menopausal status on survival.

**Table S1.** List of pathogenic mutations identified in the *BRCA1* and *BRCA2* genes in analyzed breast cancer patients.

| <i>BRCA1/2</i> Mutation Carriers |                     |     |              |                     |     |
|----------------------------------|---------------------|-----|--------------|---------------------|-----|
| Gene                             | Mutation            | No. | Gene         | Mutation            | No. |
| <i>BRCA1</i>                     | c.5266dupC          | 73  | <i>BRCA2</i> | c.5682C>G           | 4   |
|                                  | c.181T>G            | 15  |              | c.3847_3848delGT    | 3   |
|                                  | c.3700_3704delGTAAA | 14  |              | c.5946_5946delT     | 3   |
|                                  | c.1687C>T           | 9   |              | c.7913_7917delTTCCT | 3   |
|                                  | c.213-12A>G         | 5   |              | c.2808_2811delACAA  | 2   |
|                                  | c.66_67delAG        | 5   |              | c.4284_4285insT     | 2   |
|                                  | c.2411_2412delAG    | 4   |              | c.7595_7596insTT    | 2   |
|                                  | c.3756_3759delGTCT  | 4   |              | c.8042_8043delCA    | 2   |
|                                  | c.1600C>T           | 2   |              | c.8755-1G>A         | 2   |
|                                  | c.3016_3019delCATT  | 2   |              | c.9097_9098insA     | 2   |
|                                  | c.4165_4166delAG    | 2   |              | c.9435_9436delGT    | 2   |
|                                  | c.4956G>A           | 2   |              | c.1296_1297delGA    | 1   |
|                                  | c.505C>T            | 2   |              | c.1773_1776delTTAT  | 1   |
|                                  | c.5074+1G>T         | 2   |              | c.1796_1800delCTTAT | 1   |
|                                  | c.1016delA          | 1   |              | c.1813_1814insA     | 1   |
|                                  | c.115T>C            | 1   |              | c.3978_3979insTGCT  | 1   |
|                                  | c.1204delG          | 1   |              | c.3G>A              | 1   |
|                                  | c.1916T>A           | 1   |              | c.475+1G>T          | 1   |
|                                  | c.2073dupA          | 1   |              | c.5238_5239insT     | 1   |
|                                  | c.2263G>T           | 2   |              | c.5722_5723delCT    | 1   |
|                                  | c.2762delA          | 1   |              | c.5763_5764insT     | 1   |
|                                  | c.315T>A            | 1   |              | c.5763dupT          | 1   |
|                                  | c.3226delA          | 1   |              | c.604_613del10      | 1   |
|                                  | c.3239T>A           | 1   |              | c.6275_6276delTT    | 1   |
|                                  | c.3331C>T           | 1   |              | c.6444_6445insT     | 1   |
|                                  | c.3607C>T           | 1   |              | c.6444dupT          | 1   |
|                                  | c.3770_3771delAG    | 1   |              | c.6447_6448dupTA    | 1   |
|                                  | c.4158_4162delCTCTC | 1   |              | c.6591_6592delTG    | 1   |
|                                  | c.4243delG          | 1   |              | c.6754_6755dupT     | 1   |
|                                  | c.4539C>T           | 1   |              | c.7151_7152delAA    | 1   |
|                                  | c.4689C>G           | 1   |              | c.771_775delTCAAA   | 1   |
|                                  | c.4868C>G           | 1   |              | c.8363G>A           | 1   |
|                                  | c.5075-2A>G         | 1   |              | c.8535_8538delAGAG  | 1   |
|                                  | c.5152+1G>A         | 1   |              | c.9403_9403delC     | 1   |
|                                  | c.5152+2dupT        | 1   |              | c.994dupA           | 1   |
|                                  | c.5673delA          | 1   |              |                     |     |
| <b>CNVs</b>                      |                     |     |              |                     |     |
|                                  | exon 5–14del        | 10  |              |                     |     |
|                                  | exon 1–17del        | 4   |              |                     |     |
|                                  | exon 13dup          | 1   |              |                     |     |
|                                  | exon 13–19del       | 1   |              |                     |     |
|                                  | exon 18–22del       | 1   |              |                     |     |
|                                  | exon 21–22del       | 1   |              |                     |     |
|                                  | exon 21–24del       | 1   |              |                     |     |

No. – number of carriers; CNVs – copy number variants. *Note:* Mutation (at coding sequence) were annotated according to the reference sequence NM\_007294 (for *BRCA1*) and NM\_000059 (for *BRCA2*).

**Table S2.** Clinicopathological characteristics of all *BRCA1/BRCA2* mutation carriers (together and separately) and non-carriers of mutations in cancer-susceptibility genes. (*N* = denotes for individuals with known variables).

|                                                  | <i>BRCA1/2</i> Carriers ( <i>N</i> = 234) |                   |          | <i>BRCA1</i> Carriers ( <i>N</i> = 183) |                   |          | <i>BRCA2</i> Carriers ( <i>N</i> = 51) |                  |          | Non-Carriers ( <i>N</i> = 899) |                   |          |
|--------------------------------------------------|-------------------------------------------|-------------------|----------|-----------------------------------------|-------------------|----------|----------------------------------------|------------------|----------|--------------------------------|-------------------|----------|
|                                                  | <i>N</i>                                  | % *               | <i>p</i> | <i>N</i>                                | % *               | <i>p</i> | <i>N</i>                               | % *              | <i>p</i> | <i>N</i>                       | % *               | <i>p</i> |
| Median age at diagnosis year (25–75% percentile) |                                           | ( <i>N</i> = 234) |          |                                         | ( <i>N</i> = 183) |          |                                        | ( <i>N</i> = 51) |          |                                | ( <i>N</i> = 899) |          |
|                                                  | 37.7                                      | (32.9–44.0)       | <0.001   | 37.3                                    | (32.8–49.5)       | <0.001   | 39.7                                   | (34.0–50.1)      | 0.776    | 40.9                           | (33.8–49.5)       | Ref.     |
| Age diagnosis categories                         |                                           | ( <i>N</i> = 234) |          |                                         | ( <i>N</i> = 183) |          |                                        | ( <i>N</i> = 51) |          |                                | ( <i>N</i> = 899) |          |
| < 35 y                                           | 86                                        | (36.8)            | <0.001   | 71                                      | (38.8)            | <0.001   | 15                                     | (29.4)           | 0.718    | 276                            | (30.7)            | Ref.     |
| 35–44 y                                          | 96                                        | (41.0)            |          | 78                                      | (42.6)            |          | 18                                     | (35.3)           |          | 270                            | (30.0)            |          |
| ≥ 45 y                                           | 52                                        | (22.2)            |          | 34                                      | (18.6)            |          | 18                                     | (35.3)           |          | 353                            | (39.3)            |          |
| Menopausal status                                |                                           | ( <i>N</i> = 234) |          |                                         | ( <i>N</i> = 183) |          |                                        | ( <i>N</i> = 51) |          |                                | ( <i>N</i> = 889) |          |
| pre                                              | 207                                       | (88.5)            | 0.001    | 166                                     | (90.7)            | <0.001   | 41                                     | (80.4)           | 0.838    | 712                            | (79.2)            | Ref.     |
| post                                             | 27                                        | (11.5)            |          | 17                                      | (9.3)             |          | 10                                     | (19.6)           |          | 187                            | (20.8)            |          |
| Primary tumor (T)                                |                                           | ( <i>N</i> = 227) |          |                                         | ( <i>N</i> = 180) |          |                                        | ( <i>N</i> = 47) |          |                                | ( <i>N</i> = 867) |          |
| Tis                                              | 1                                         | (0.4)             | <0.001   | 1                                       | (0.6)             | <0.001   | 0                                      | (0.0)            | 0.156    | 45                             | (5.2)             | Ref.     |
| T1 (<2 cm)                                       | 78                                        | (34.4)            |          | 57                                      | (31.7)            |          | 21                                     | (44.7)           |          | 417                            | (48.1)            |          |
| T2 (2–5 cm)                                      | 110                                       | (48.5)            |          | 94                                      | (52.2)            |          | 16                                     | (34.0)           |          | 303                            | (34.9)            |          |
| T3 (>5 cm)                                       | 26                                        | (11.5)            |          | 19                                      | (10.6)            |          | 7                                      | (14.9)           |          | 81                             | (9.3)             |          |
| T4                                               | 12                                        | (5.3)             |          | 9                                       | (5.0)             |          | 3                                      | (6.4)            |          | 21                             | (2.4)             |          |
| Regional lymphatic node (N)                      |                                           | ( <i>N</i> = 227) |          |                                         | ( <i>N</i> = 180) |          |                                        | ( <i>N</i> = 47) |          |                                | ( <i>N</i> = 867) |          |
| N0                                               | 121                                       | (53.3)            | 0.088    | 101                                     | (56.1)            | 0.120    | 20                                     | (42.6)           | 0.068    | 526                            | (60.7)            | Ref.     |
| N1                                               | 92                                        | (40.5)            |          | 67                                      | (37.2)            |          | 25                                     | (53.2)           |          | 301                            | (34.7)            |          |
| N2                                               | 9                                         | (4.0)             |          | 7                                       | (3.9)             |          | 2                                      | (4.3)            |          | 33                             | (3.8)             |          |
| N3                                               | 5                                         | (2.2)             |          | 5                                       | (2.8)             |          | 0                                      | (0.0)            |          | 7                              | (0.8)             |          |
| Tumor stage                                      |                                           | ( <i>N</i> = 228) |          |                                         | ( <i>N</i> = 180) |          |                                        | ( <i>N</i> = 48) |          |                                | ( <i>N</i> = 889) |          |
| 0 (TisN0)                                        | 1                                         | (0.4)             | <0.001   | 1                                       | (0.6)             | <0.001   | 0                                      | (0.0)            | 0.024    | 44                             | (4.9)             | Ref.     |
| I (T1N0–1mi)                                     | 58                                        | (25.4)            |          | 45                                      | (25.0)            |          | 13                                     | (25.5)           |          | 334                            | (37.6)            |          |
| II (T2–3N0, T1–2N1)                              | 123                                       | (53.9)            |          | 101                                     | (56.1)            |          | 22                                     | (43.1)           |          | 389                            | (43.8)            |          |
| III (T3N1, TXN2–3, T4NX)                         | 45                                        | (19.7)            |          | 33                                      | (18.3)            |          | 12                                     | (23.5)           |          | 99                             | (11.1)            |          |
| IV (M1)                                          | 1                                         | (0.4)             |          | 0                                       | (0.0)             |          | 1                                      | (2.0)            |          | 23                             | (2.6)             |          |
| Tumor morphology                                 |                                           | ( <i>N</i> = 232) |          |                                         | ( <i>N</i> = 182) |          |                                        | ( <i>N</i> = 50) |          |                                | ( <i>N</i> = 891) |          |
| ductal                                           | 195                                       | (84.1)            | 0.012    | 151                                     | (83.0)            | 0.001    | 44                                     | (88.0)           | 0.390    | 738                            | (82.8)            | Ref.     |

|                            |     |           |        |     |           |        |    |          |       |     |           |      |
|----------------------------|-----|-----------|--------|-----|-----------|--------|----|----------|-------|-----|-----------|------|
| lobular                    | 6   | (2.6)     |        | 3   | (1.6)     |        | 3  | (6.0)    |       | 70  | (7.9)     |      |
| medullar                   | 18  | (7.8)     |        | 18  | (9.9)     |        | 0  | (0.0)    |       | 43  | (4.8)     |      |
| other                      | 13  | (5.6)     |        | 10  | (5.5)     |        | 3  | (6.0)    |       | 40  | (4.5)     |      |
| Tumor grade                |     | (N = 216) |        |     | (N = 173) |        |    | (N = 43) |       |     | (N = 832) |      |
| low (1)                    | 8   | (3.7)     | <0.001 | 5   | (2.9)     | <0.001 | 3  | (7.0)    | 0.437 | 115 | (13.8)    | Ref. |
| intermediate (2)           | 70  | (32.4)    |        | 49  | (28.3)    |        | 21 | (48.8)   |       | 383 | (46.0)    |      |
| high (3)                   | 138 | (63.9)    |        | 119 | (68.8)    |        | 19 | (44.2)   |       | 334 | (40.1)    |      |
| ER status                  |     | (N = 213) |        |     | (N = 169) |        |    | (N = 44) |       |     | (N = 827) |      |
| positive                   | 72  | (33.8)    | <0.001 | 45  | (26.6)    | <0.001 | 27 | (61.4)   | 0.519 | 546 | (66.0)    | Ref. |
| PR status                  |     | (N = 207) |        |     | (N = 164) |        |    | (N = 43) |       |     | (N = 799) |      |
| positive                   | 69  | (33.3)    | <0.001 | 39  | (23.8)    | <0.001 | 30 | (69.8)   | 0.419 | 502 | (62.8)    | Ref. |
| HER-2 status               |     | (N = 193) |        |     | (N = 152) |        |    | (N = 41) |       |     | (N = 732) |      |
| positive                   | 13  | (6.7)     | <0.001 | 10  | (6.6)     | <0.001 | 3  | (7.3)    | 0.012 | 556 | (24.0)    | Ref. |
| TNBC                       |     | (N = 193) |        |     | (N = 152) |        |    | (N = 41) |       |     | (N = 729) |      |
| yes                        | 115 | (59.6)    | <0.001 | 105 | (69.1)    | <0.001 | 10 | (24.4)   | 0.547 | 145 | (19.9)    | Ref. |
| Surgery – primary tumor    |     | (N = 231) |        |     | (N = 182) |        |    | (N = 49) |       |     | (N = 876) |      |
| mastectomy                 | 122 | (52.8)    | 0.484  | 94  | (51.6)    | 0.727  | 28 | (57.1)   | 0.346 | 440 | (50.2)    | Ref. |
| breast-conserving surgery  | 109 | (47.2)    |        | 88  | (48.4)    |        | 21 | (42.9)   |       | 436 | (49.8)    |      |
| Surgery – lymphatic nodes  |     | (N = 227) |        |     | (N = 181) |        |    | (N = 46) |       |     | (N = 859) |      |
| axillary dissection        | 184 | (81.1)    | 0.054  | 146 | (80.7)    | 0.105  | 38 | (82.6)   | 0.294 | 643 | (74.9)    | Ref. |
| sentinel node biopsy       | 43  | (18.9)    |        | 35  | (19.3)    |        | 8  | (17.4)   |       | 216 | (25.1)    |      |
| Radiotherapy               |     | (N = 229) |        |     | (N = 181) |        |    | (N = 48) |       |     | (N = 869) |      |
| yes                        | 157 | (68.6)    | 0.475  | 128 | (70.7)    | 0.225  | 29 | (60.4)   | 0.423 | 574 | (66.1)    | Ref. |
| Chemotherapy type          |     | (N = 232) |        |     | (N = 182) |        |    | (N = 50) |       |     | (N = 873) |      |
| Antra + Tax                | 122 | (52.6)    | <0.001 | 97  | (53.3)    | <0.001 | 25 | (50.0)   | 0.214 | 311 | (35.6)    | Ref. |
| Antra                      | 61  | (26.3)    |        | 49  | (26.9)    |        | 12 | (24.0)   |       | 243 | (27.8)    |      |
| Other                      | 21  | (9.1)     |        | 17  | (9.3)     |        | 4  | (8.0)    |       | 85  | (9.7)     |      |
| No chemotherapy            | 28  | (12.1)    |        | 19  | (10.4)    |        | 9  | (18.0)   |       | 234 | (26.8)    |      |
| Endocrine therapy **       |     | (N = 65)  |        |     | (N = 38)  |        |    | (N = 27) |       |     | (N = 490) |      |
| TAM monotherapy            | 26  | (40.0)    | 0.961  | 18  | (47.4)    | 0.886  | 8  | (29.6)   | 0.655 | 203 | (41.4)    | Ref. |
| AI monotherapy             | 8   | (12.3)    |        | 4   | (10.5)    |        | 4  | (14.8)   |       | 66  | (13.5)    |      |
| LHRH analogues + TAM       | 29  | (44.6)    |        | 15  | (39.5)    |        | 14 | (51.9)   |       | 210 | (42.9)    |      |
| LHRH analogues + AI        | 2   | (3.1)     |        | 1   | (2.6)     |        | 1  | (3.7)    |       | 11  | (2.2)     |      |
| Event during follow-up *** |     | (N = 233) |        |     | (N = 183) |        |    | (N = 51) |       |     | (N = 876) |      |



|                             |                 |        |                  |                  |        |                  |                 |        |              |                |        |      |
|-----------------------------|-----------------|--------|------------------|------------------|--------|------------------|-----------------|--------|--------------|----------------|--------|------|
| loco-regional recurrence    | 14              | (6.0)  | 0.169            | 13               | (7.1)  | 0.457            | 1               | (2.0)  | 0.093        | 77             | (8.8)  | Ref. |
| distant metastasis          | 47              | (20.2) | <b>0.002</b>     | 28               | (15.3) | 0.289            | 19              | (38.0) | <b>0.027</b> | 110            | (12.6) | Ref. |
| second breast cancer        | 43              | (18.5) | <b>&lt;0.001</b> | 34               | (18.6) | <b>&lt;0.001</b> | 9               | (18.0) | <b>0.026</b> | 76             | (8.7)  | Ref. |
| second tumors               | 12              | (5.2)  | 0.753            | 10               | (5.5)  | 0.805            | 2               | (4.0)  | 0.570        | 52             | (5.9)  | Ref. |
| Median of follow-up (years) | (N = 234)       |        |                  | (N = 183)        |        |                  | (N = 51)        |        |              | (N = 899)      |        |      |
| median (25–75% percentil)   | 10.0 (6.3–16.0) |        | 0.235            | 9.6 (6.14–15.44) |        | 0.692            | 11.2 (7.7–17.3) |        | <b>0.048</b> | 9.8 (5.9–15.8) |        | Ref. |
| Breast cancer-related death | (N = 234)       |        |                  | (N = 183)        |        |                  | (N = 51)        |        |              | (N = 899)      |        |      |
| yes                         | 32              | (13.7) | 0.507            | 22               | (12.0) | 0.429            | 13              | (25.5) | <b>0.028</b> | 128            | (14.2) | Ref. |

\* % = percentage of known; \*\* N = number of patients with ER-positive BC; \*\*\* patient could be counted in more than one event; pre – premenopausal; post – postmenopausal; TNBC – triple-negative BC; Antra – anthracyclines; Tax – taxanes; TAM – tamoxifen; AI – aromatase inhibitor; LHRH - luteinizing hormone-releasing hormone; Ref. – reference.

**Table S3.** Analysis of 10-year DFS and DSS using the Mantel-Haenszel test comparing variables within subgroups of *BRCA1/2* mutation carriers and non-carriers, respectively.

| Variable          | Category | Disease Free Survival (DFS) Analysis |        |      |              |                   |              |              |        |      |              |                   | Disease Specific Survival (DSS) Analysis |         |        |      |             |                  |                  |         |        |      |             |                  |                  |
|-------------------|----------|--------------------------------------|--------|------|--------------|-------------------|--------------|--------------|--------|------|--------------|-------------------|------------------------------------------|---------|--------|------|-------------|------------------|------------------|---------|--------|------|-------------|------------------|------------------|
|                   |          | <i>BRCA1/2</i> Carriers              |        |      |              |                   |              | Non-carriers |        |      |              |                   | <i>BRCA1/2</i> Carriers                  |         |        |      |             |                  | Non-Carriers     |         |        |      |             |                  |                  |
|                   |          | Pts No.                              | Ev No. | Ev % | HR           | 95% CI            | <i>p</i>     | Pts No.      | Ev No. | Ev % | HR           | 95% CI            | <i>p</i>                                 | Pts No. | Ev No. | %    | HR          | 95% CI           | <i>p</i>         | Pts No. | Ev No. | %    | HR          | 95% CI           | <i>p</i>         |
| All Pts           |          | 191                                  | 46     | 24.1 | -            | -                 | -            | 680          | 128    | 18.8 | -            | -                 | -                                        | 191     | 28     | 14.7 | -           | -                | -                | 680     | 64     | 9.4  | -           | -                | -                |
| Age at diagnosis  | <35      | 78                                   | 18     | 23.1 | 0.98         | 0.55–1.78         | 0.960        | 213          | 60     | 28.2 | <b>2.21</b>  | <b>1.51–3.22</b>  | <b>&lt;0.001</b>                         | 78      | 12     | 15.4 | 1.16        | 0.54–2.48        | 0.703            | 213     | 32     | 15.0 | <b>2.29</b> | <b>1.35–3.87</b> | <b>0.002</b>     |
|                   | ≥35      | 113                                  | 28     | 24.8 | Ref.         |                   |              | 467          | 68     | 14.6 | Ref.         |                   |                                          | 113     | 16     | 14.2 | Ref.        |                  |                  | 467     | 32     | 6.9  | Ref.        |                  |                  |
|                   | <45      | 150                                  | 34     | 22.7 | 0.84         | 0.42–1.67         | 0.612        | 422          | 100    | 23.7 | <b>2.17</b>  | <b>1.53–3.09</b>  | <b>&lt;0.001</b>                         | 150     | 21     | 14.0 | 0.88        | 0.36–2.13        | 0.779            | 422     | 49     | 11.6 | <b>1.98</b> | <b>1.20–3.26</b> | <b>0.008</b>     |
|                   | ≥45      | 41                                   | 12     | 29.3 | Ref.         |                   |              | 258          | 28     | 10.9 | Ref.         |                   |                                          | 41      | 7      | 17.1 | Ref.        |                  |                  | 258     | 15     | 5.8  | Ref.        |                  |                  |
| Menopausal status | pre      | 168                                  | 39     | 23.2 | 0.80         | 0.34–1.90         | 0.611        | 532          | 119    | 22.4 | <b>1.71</b>  | <b>1.15–2.56</b>  | <b>0.009</b>                             | 168     | 23     | 13.7 | 0.62        | 0.20–1.90        | 0.406            | 532     | 55     | 10.3 | 1.53        | 0.88–2.64        | 0.129            |
|                   | post     | 23                                   | 7      | 30.4 | Ref.         |                   |              | 148          | 18     | 12.2 | Ref.         |                   |                                          | 23      | 5      | 21.7 | Ref.        |                  |                  | 148     | 9      | 6.1  | Ref.        |                  |                  |
| Tumor size        | T1       | 71                                   | 11     | 15.5 | Ref.         |                   |              | 355          | 45     | 12.7 | Ref.         |                   |                                          | 71      | 4      | 5.6  | Ref.        |                  |                  | 355     | 18     | 5.1  | Ref.        |                  |                  |
|                   | T2       | 84                                   | 20     | 23.8 | 1.63         | 0.80–2.29         | 0.176        | 244          | 52     | 21.3 | <b>1.94</b>  | <b>1.28–2.92</b>  | <b>0.002</b>                             | 84      | 12     | 14.3 | 2.53        | 0.95–6.76        | 0.063            | 244     | 29     | 11.9 | <b>2.76</b> | <b>1.53–4.98</b> | <b>0.001</b>     |
|                   | T3       | 24                                   | 9      | 37.5 | <b>3.45</b>  | <b>1.22–9.77</b>  | <b>0.020</b> | 62           | 23     | 37.1 | <b>7.25</b>  | <b>3.52–14.93</b> | <b>&lt;0.001</b>                         | 24      | 7      | 29.2 | <b>7.91</b> | <b>2.02–31.0</b> | <b>0.003</b>     | 62      | 13     | 21.0 | <b>12.4</b> | <b>4.38–35.2</b> | <b>&lt;0.001</b> |
|                   | T4       | 12                                   | 6      | 50.0 | <b>13.18</b> | <b>2.83–61.48</b> | <b>0.001</b> | 19           | 8      | 42.1 | <b>19.71</b> | <b>4.91–79.13</b> | <b>&lt;0.001</b>                         | 12      | 5      | 41.7 | <b>94.9</b> | <b>11.8–766</b>  | <b>&lt;0.001</b> | 19      | 4      | 21.1 | <b>31.7</b> | <b>3.96–253</b>  | <b>0.001</b>     |
| Nodal status      | N0       | 100                                  | 17     | 17.0 | Ref.         |                   |              | 387          | 51     | 13.2 | Ref.         |                   |                                          | 100     | 11     | 11.0 | Ref.        |                  |                  | 387     | 19     | 4.9  | Ref.        |                  |                  |
|                   | N1       | 78                                   | 25     | 32.1 | <b>2.35</b>  | <b>1.27–4.38</b>  | <b>0.007</b> | 256          | 64     | 25.0 | <b>2.17</b>  | <b>1.49–3.16</b>  | <b>&lt;0.001</b>                         | 78      | 15     | 19.2 | 2.12        | 0.96–4.65        | 0.062            | 256     | 38     | 14.8 | <b>3.40</b> | <b>2.00–5.80</b> | <b>&lt;0.001</b> |
|                   | N2       | 8                                    | 2      | 25.0 | 1.62         | 0.29–9.12         | 0.587        | 30           | 9      | 30.0 | <b>5.19</b>  | <b>1.77–15.21</b> | <b>0.003</b>                             | 8       | 1      | 12.5 | 1.26        | 0.13–11.8        | 0.842            | 30      | 4      | 13.3 | <b>6.09</b> | <b>1.16–32.1</b> | <b>0.033</b>     |
|                   | N3       | 5                                    | 2      | 40.0 | 5.56         | 0.56–55.54        | 0.144        | 7            | 4      | 57.1 | <b>141.7</b> | <b>12.93–1553</b> | <b>&lt;0.001</b>                         | 5       | 1      | 20.0 | 2.94        | 0.17–51.1        | 0.459            | 7       | 3      | 42.9 | -           | -                | -                |
| Tumor stage       | I        | 52                                   | 7      | 13.5 | Ref.         |                   |              | 282          | 28     | 9.9  | Ref.         |                   |                                          | 52      | 2      | 3.8  | Ref.        |                  |                  | 282     | 8      | 2.8  | Ref.        |                  |                  |
|                   | II       | 97                                   | 23     | 23.7 | 1.78         | 0.85–3.74         | 0.128        | 310          | 65     | 21.0 | <b>2.26</b>  | <b>1.50–3.39</b>  | <b>&lt;0.001</b>                         | 97      | 15     | 15.5 | <b>2.86</b> | <b>1.06–7.71</b> | <b>0.038</b>     | 310     | 37     | 11.9 | <b>3.61</b> | <b>2.01–6.48</b> | <b>&lt;0.001</b> |
|                   | III      | 42                                   | 16     | 38.1 | <b>3.25</b>  | <b>1.41–7.46</b>  | <b>0.006</b> | 88           | 35     | 39.8 | <b>10.35</b> | <b>5.53–19.38</b> | <b>&lt;0.001</b>                         | 42      | 11     | 26.2 | <b>5.96</b> | <b>1.97–19.0</b> | <b>0.002</b>     | 88      | 19     | 21.6 | <b>19.6</b> | <b>7.74–49.4</b> | <b>&lt;0.001</b> |
| Tumor grade       | 1        | 7                                    | 2      | 28.6 | Ref.         |                   |              | 91           | 6      | 6.6  | Ref.         |                   |                                          | 7       | 1      | 14.3 | Ref.        |                  |                  | 91      | 1      | 1.1  | Ref.        |                  |                  |
|                   | 2        | 59                                   | 16     | 27.1 | 1.01         | 0.23–4.38         | 0.986        | 311          | 59     | 19.0 | <b>2.21</b>  | <b>1.24–3.92</b>  | <b>0.007</b>                             | 59      | 9      | 15.3 | 1.20        | 0.18–8.14        | 0.856            | 311     | 21     | 6.8  | 2.75        | 1.00–7.57        | 0.051            |
|                   | 3        | 125                                  | 28     | 22.4 | 0.89         | 0.20–4.01         | 0.880        | 278          | 63     | 22.7 | <b>2.55</b>  | <b>1.50–4.33</b>  | <b>0.001</b>                             | 125     | 18     | 14.4 | 1.16        | 0.18–7.59        | 0.874            | 278     | 42     | 15.1 | <b>3.44</b> | <b>1.74–6.79</b> | <b>&lt;0.001</b> |
| ER status         | pos      | 60                                   | 23     | 38.3 | <b>2.33</b>  | <b>1.25–4.33</b>  | <b>0.008</b> | 445          | 74     | 16.6 | <b>0.66</b>  | <b>0.46–0.95</b>  | <b>0.027</b>                             | 60      | 13     | 21.7 | 1.82        | 0.83–4.00        | 0.136            | 445     | 28     | 6.3  | <b>0.37</b> | <b>0.22–0.62</b> | <b>&lt;0.001</b> |
|                   | neg      | 131                                  | 23     | 17.6 | Ref.         |                   |              | 235          | 54     | 23.0 | Ref.         |                   |                                          | 131     | 15     | 11.5 | Ref.        |                  |                  | 235     | 36     | 15.3 | Ref.        |                  |                  |
| PR status         | pos      | 62                                   | 22     | 35.5 | <b>2.01</b>  | <b>1.09–3.73</b>  | <b>0.026</b> | 428          | 76     | 17.8 | 0.79         | 0.55–1.13         | 0.200                                    | 62      | 10     | 16.1 | 1.07        | 0.49–2.34        | 0.861            | 428     | 30     | 7.0  | <b>0.46</b> | <b>0.27–0.77</b> | <b>0.003</b>     |
|                   | neg      | 129                                  | 24     | 18.6 | Ref.         |                   |              | 252          | 52     | 20.6 | Ref.         |                   |                                          | 129     | 18     | 14.0 | Ref.        |                  |                  | 252     | 34     | 13.5 | Ref.        |                  |                  |
| HER-2 status      | pos      | 13                                   | 4      | 30.8 | 1.57         | 0.47–5.25         | 0.464        | 164          | 34     | 20.7 | 1.21         | 0.86–2.08         | 0.369                                    | 13      | 2      | 15.4 | 1.18        | 0.25–5.50        | 0.832            | 164     | 19     | 11.6 | 1.46        | 0.81–2.61        | 0.205            |
|                   | neg      | 178                                  | 42     | 23.6 | Ref.         |                   |              | 516          | 94     | 18.2 | Ref.         |                   |                                          | 178     | 26     | 14.6 | Ref.        |                  |                  | 516     | 45     | 8.7  | Ref.        |                  |                  |
| TNBC              | yes      | 114                                  | 20     | 17.5 | <b>0.50</b>  | <b>0.28–0.90</b>  | <b>0.021</b> | 138          | 30     | 21.7 | 1.34         | 0.86–2.08         | 0.197                                    | 114     | 14     | 12.3 | 0.70        | 0.33–1.48        | 0.350            | 138     | 21     | 15.2 | <b>2.40</b> | <b>1.29–4.46</b> | <b>0.006</b>     |
|                   | no       | 77                                   | 26     | 33.8 | Ref.         |                   |              | 542          | 98     | 18.1 | Ref.         |                   |                                          | 77      | 14     | 18.2 | Ref.        |                  |                  | 542     | 43     | 7.9  | Ref.        |                  |                  |

Pts No. – number of patients; Ev No. – number of events; Ev % - percentage of events; HR – hazard ratio; 95% CI – 95% confidential interval; pre – premenopausal; post – postmenopausal; pos – positive; neg – negative; Ref. – reference.

**Table S4.** Analysis of 10-year DFS and DSS using a univariate Cox regression model comparing variables within subgroups of *BRCA1/2* mutation carriers and non-carriers.

| Variable          | Category            | Disease Free Survival (DFS) Analysis |           |          |              |           |          | Disease Specific Survival (DSS) Analysis |           |          |              |           |          |
|-------------------|---------------------|--------------------------------------|-----------|----------|--------------|-----------|----------|------------------------------------------|-----------|----------|--------------|-----------|----------|
|                   |                     | <i>BRCA1/2</i> Carriers              |           |          | Non-Carriers |           |          | <i>BRCA1/2</i> Carriers                  |           |          | Non-Carriers |           |          |
|                   |                     | HR                                   | 95% CI    | <i>p</i> | HR           | 95% CI    | <i>p</i> | HR                                       | 95% CI    | <i>p</i> | HR           | 95% CI    | <i>p</i> |
| Age at diagnosis  | continuous          | 1.01                                 | 0.98–1.04 | 0.564    | 0.96         | 0.95–0.98 | <0.001   | 1.00                                     | 0.96–1.04 | 0.975    | 0.96         | 0.93–0.98 | 0.002    |
|                   | <35 vs ≥35 (Ref.)   | 0.98                                 | 0.55–1.78 | 0.960    | 2.04         | 1.44–2.89 | <0.001   | 1.16                                     | 0.55–2.45 | 0.703    | 2.13         | 1.30–3.47 | 0.003    |
|                   | <45 vs ≥45 (Ref.)   | 0.84                                 | 0.44–1.63 | 0.612    | 2.44         | 1.60–3.71 | <0.001   | 0.88                                     | 0.38–2.08 | 0.780    | 2.16         | 1.21–3.84 | 0.009    |
| menopausal status | pre vs post (Ref.)  | 0.81                                 | 0.36–1.81 | 0.611    | 1.92         | 1.15–3.20 | 0.012    | 0.67                                     | 0.25–1.75 | 0.409    | 1.74         | 0.86–3.53 | 0.122    |
|                   | T2–4 vs T1 (Ref.)   | 2.09                                 | 1.06–4.12 | 0.033    | 2.30         | 1.60–3.30 | <0.001   | 3.92                                     | 1.36–11.3 | 0.011    | 3.18         | 1.84–5.49 | <0.001   |
| Tumor size        | T3–4 vs T1–2 (Ref.) | 2.43                                 | 1.31–4.51 | 0.005    | 2.82         | 1.88–4.23 | <0.001   | 3.55                                     | 1.68–7.51 | 0.001    | 2.97         | 1.70–5.17 | <0.001   |
|                   | T4 vs T1–3 (Ref.)   | 3.00                                 | 1.27–7.08 | 0.012    | 2.76         | 1.35–5.65 | 0.005    | 4.34                                     | 1.64–11.4 | 0.003    | 2.73         | 0.99–7.50 | 0.052    |
| Nodal status      | N1–3 vs N0 (Ref.)   | 2.23                                 | 1.23–4.07 | 0.009    | 2.23         | 1.57–3.18 | <0.001   | 1.97                                     | 0.92–4.21 | 0.080    | 3.43         | 2.01–5.87 | <0.001   |
|                   | N2–3 vs N0–1 (Ref.) | 1.30                                 | 0.47–3.64 | 0.613    | 2.41         | 1.36–4.27 | 0.003    | 1.10                                     | 0.26–4.63 | 0.898    | 2.44         | 1.11–5.35 | 0.026    |
|                   | N3 vs N0–2 (Ref.)   | 1.90                                 | 0.46–7.86 | 0.373    | 4.00         | 1.48–10.9 | 0.006    | 1.57                                     | 0.21–11.6 | 0.658    | 6.76         | 2.11–21.6 | 0.001    |
| Tumor stage       | II–III vs I (Ref.)  | 2.30                                 | 1.03–5.13 | 0.043    | 2.90         | 1.91–4.42 | <0.001   | 5.26                                     | 1.25–22.2 | 0.024    | 5.55         | 2.65–11.7 | <0.001   |
|                   | III vs I–II (Ref.)  | 2.16                                 | 1.18–3.97 | 0.013    | 3.12         | 2.12–4.61 | <0.001   | 2.58                                     | 1.21–5.50 | 0.015    | 3.22         | 1.88–5.51 | <0.001   |
| Tumor grade       | 2–3 vs 1 (Ref.)     | 0.94                                 | 0.23–3.88 | 0.933    | 3.44         | 1.52–7.82 | 0.003    | 1.20                                     | 0.16–8.81 | 0.860    | 9.97         | 1.38–71.9 | 0.023    |
|                   | 3 vs 1–2 (Ref.)     | 0.90                                 | 0.50–1.63 | 0.728    | 1.57         | 1.11–2.22 | 0.011    | 1.07                                     | 0.49–2.31 | 0.870    | 3.10         | 1.85–5.20 | <0.001   |
| ER status         | pos vs neg (Ref.)   | 2.15                                 | 1.21–3.84 | 0.009    | 0.67         | 0.47–0.96 | 0.028    | 1.75                                     | 0.83–3.67 | 0.141    | 0.40         | 0.24–0.65 | <0.001   |
| PR status         | pos vs neg (Ref.)   | 1.91                                 | 1.07–3.40 | 0.029    | 0.79         | 0.56–1.13 | 0.201    | 1.07                                     | 0.49–2.32 | 0.861    | 0.48         | 0.29–0.79 | 0.004    |
| HER–2 status      | pos vs neg (Ref.)   | 1.46                                 | 0.52–4.09 | 0.467    | 1.20         | 0.81–1.77 | 0.370    | 1.17                                     | 0.28–4.93 | 0.832    | 1.41         | 0.83–2.42 | 0.206    |
| TNBC              | yes vs no (Ref.)    | 0.51                                 | 0.28–0.91 | 0.024    | 1.31         | 0.87–1.97 | 0.198    | 0.70                                     | 0.34–1.48 | 0.352    | 2.05         | 1.22–3.45 | 0.007    |

Pts No. – number of patients; Ev No. – number of events; OR – odds ratio; 95% CI – 95% confidential interval; pre – premenopausal; post – postmenopausal; pos – positive; neg – negative; Ref. – reference.

**Table S5.** Analysis of 10-year DFS and DSS using multivariable Cox proportional-hazard models adjusted for age, menopausal status, stage, tumor grade and ER status.

|                                 | BRCA1/2 Carriers |                  |              |             |                  |              | Non-Carriers |                  |                  |             |                  |                  |
|---------------------------------|------------------|------------------|--------------|-------------|------------------|--------------|--------------|------------------|------------------|-------------|------------------|------------------|
|                                 | DFS              |                  |              | DSS         |                  |              | DFS          |                  |                  | DSS         |                  |                  |
|                                 | HR               | 95%CI            | p-Value      | HR          | 95%CI            | p-Value      | HR           | 95%CI            | p-Value          | HR          | 95%CI            | p-Value          |
| <b>model A</b>                  |                  |                  |              |             |                  |              |              |                  |                  |             |                  |                  |
| Age (continuous)                | 1.01             | 0.97–1.06        | 0.552        | 0.99        | 0.94–1.04        | 0.661        | <b>0.96</b>  | <b>0.93–0.98</b> | <b>0.001</b>     | <b>0.95</b> | <b>0.92–0.99</b> | <b>0.014</b>     |
| Menopausal status (post vs pre) | 1.04             | 0.32–3.38        | 0.948        | 0.41        | 0.10–1.77        | 0.234        | 0.60         | 0.27–1.32        | 0.205            | 0.44        | 0.14–1.34        | 0.148            |
| Tumor stage (II–III vs I)       | <b>2.38</b>      | <b>1.04–5.48</b> | <b>0.041</b> | <b>5.63</b> | <b>1.30–24.4</b> | <b>0.021</b> | <b>2.54</b>  | <b>1.66–3.89</b> | <b>&lt;0.001</b> | <b>4.56</b> | <b>2.16–9.63</b> | <b>&lt;0.001</b> |
| Tumor grade (3 vs 1–2)          | 1.20             | 0.64–2.27        | 0.571        | 1.36        | 0.59–3.17        | 0.470        | 1.10         | 0.75–1.63        | 0.629            | <b>1.92</b> | <b>1.09–3.38</b> | <b>0.025</b>     |
| ER–status (pos vs neg)          | <b>2.19</b>      | <b>1.17–4.09</b> | <b>0.014</b> | 1.70        | 0.76–3.82        | 0.197        | 0.76         | 0.51–1.12        | 0.161            | <b>0.57</b> | <b>0.33–0.98</b> | <b>0.041</b>     |
| <b>model B</b>                  |                  |                  |              |             |                  |              |              |                  |                  |             |                  |                  |
| Age (<35 vs ≥35)                | 0.92             | 0.49–1.74        | 0.796        | 1.18        | 0.52–2.70        | 0.692        | <b>1.70</b>  | <b>1.17–2.48</b> | <b>0.005</b>     | <b>1.67</b> | <b>0.98–2.87</b> | <b>0.060</b>     |
| Menopausal status (post vs pre) | 0.84             | 0.34–2.06        | 0.707        | 0.48        | 0.16–1.44        | 0.191        | 1.24         | 0.71–2.16        | 0.442            | 1.01        | 0.46–2.18        | 0.987            |
| Tumor stage (II–III vs I)       | <b>2.33</b>      | <b>1.02–5.35</b> | <b>0.045</b> | <b>5.75</b> | <b>1.34–24.8</b> | <b>0.019</b> | <b>2.61</b>  | <b>1.71–4.01</b> | <b>&lt;0.001</b> | <b>4.73</b> | <b>2.24–9.99</b> | <b>&lt;0.001</b> |
| Tumor grade (3 vs 1–2)          | 1.19             | 0.63–2.25        | 0.593        | 1.37        | 0.59–3.17        | 0.468        | 1.11         | 0.75–1.64        | 0.594            | <b>1.91</b> | <b>1.08–3.37</b> | <b>0.025</b>     |
| ER–status (pos vs neg)          | <b>2.19</b>      | <b>1.17–4.11</b> | <b>0.015</b> | 1.70        | 0.76–3.82        | 0.200        | 0.76         | 0.51–1.12        | 0.169            | <b>0.57</b> | <b>0.33–0.97</b> | <b>0.039</b>     |
| <b>model C</b>                  |                  |                  |              |             |                  |              |              |                  |                  |             |                  |                  |
| Age (<45 vs ≥45)                | 0.92             | 0.38–2.23        | 0.847        | 1.14        | 0.34–3.83        | 0.830        | <b>2.41</b>  | <b>1.30–4.48</b> | <b>0.005</b>     | 1.86        | 0.81–4.27        | 0.141            |
| menopausal status (post vs pre) | 0.87             | 0.29–2.60        | 0.801        | 0.47        | 0.14–1.88        | 0.287        | 0.76         | 0.36–1.62        | 0.481            | 0.78        | 0.29–2.14        | 0.632            |
| Tumor stage (II–III vs I)       | <b>2.33</b>      | <b>1.02–5.32</b> | <b>0.046</b> | <b>5.76</b> | <b>1.34–24.8</b> | <b>0.019</b> | <b>2.53</b>  | <b>1.65–3.88</b> | <b>0.000</b>     | <b>4.57</b> | <b>2.16–9.67</b> | <b>&lt;0.001</b> |
| Tumor grade (3 vs 1–2)          | 1.18             | 0.63–2.23        | 0.602        | 1.38        | 0.60–3.19        | 0.452        | 1.12         | 0.76–1.65        | 0.578            | <b>1.93</b> | <b>1.09–3.41</b> | <b>0.023</b>     |
| ER–status (pos vs neg)          | <b>2.17</b>      | <b>1.16–4.05</b> | <b>0.015</b> | 1.73        | 0.77–3.88        | 0.181        | 0.74         | 0.50–1.10        | 0.137            | <b>0.56</b> | <b>0.32–0.95</b> | <b>0.033</b>     |
| <b>model D</b>                  |                  |                  |              |             |                  |              |              |                  |                  |             |                  |                  |
| Age (continuous)                | 1.01             | 0.96–1.05        | 0.758        | 0.98        | 0.92–1.03        | 0.426        | <b>0.96</b>  | <b>0.93–0.98</b> | <b>0.001</b>     | <b>0.95</b> | <b>0.91–0.99</b> | <b>0.008</b>     |
| Menopausal status (post vs pre) | 1.00             | 0.29–3.39        | 0.995        | 0.37        | 0.08–1.75        | 0.209        | 0.65         | 0.30–1.41        | 0.276            | 0.47        | 0.15–1.42        | 0.181            |
| Tumor stage (III vs I–II)       | <b>1.93</b>      | <b>1.01–3.67</b> | <b>0.047</b> | <b>2.50</b> | <b>1.11–5.63</b> | <b>0.026</b> | <b>2.99</b>  | <b>2.00–4.47</b> | <b>0.000</b>     | <b>2.78</b> | <b>1.60–4.85</b> | <b>&lt;0.001</b> |
| Tumor grade (3 vs 1–2)          | 1.10             | 0.57–2.11        | 0.775        | 1.15        | 0.48–2.72        | 0.755        | 1.02         | 0.69–1.52        | 0.918            | <b>1.81</b> | <b>1.01–3.24</b> | <b>0.047</b>     |
| ER–status (pos vs neg)          | <b>1.97</b>      | <b>1.02–3.78</b> | <b>0.043</b> | 1.48        | 0.64–3.45        | 0.361        | <b>0.66</b>  | <b>0.45–0.98</b> | <b>0.039</b>     | <b>0.50</b> | <b>0.29–0.87</b> | <b>0.014</b>     |
| <b>model E</b>                  |                  |                  |              |             |                  |              |              |                  |                  |             |                  |                  |
| Age (<35 vs ≥35)                | 1.03             | 0.54–1.94        | 0.937        | 1.32        | 0.58–3.03        | 0.505        | <b>1.63</b>  | <b>1.12–2.39</b> | <b>0.011</b>     | 1.59        | 0.92–2.73        | 0.094            |
| Menopausal status (post vs pre) | 0.86             | 0.35–2.11        | 0.735        | 0.52        | 0.17–1.57        | 0.245        | 1.43         | 0.82–2.48        | 0.203            | 1.18        | 0.55–2.55        | 0.673            |
| Tumor stage (III vs I–II)       | <b>1.93</b>      | <b>1.01–3.68</b> | <b>0.047</b> | <b>2.56</b> | <b>1.14–5.75</b> | <b>0.023</b> | <b>2.90</b>  | <b>1.94–4.34</b> | <b>0.000</b>     | <b>2.70</b> | <b>1.55–4.71</b> | <b>&lt;0.001</b> |
| Tumor grade (3 vs 1–2)          | 1.08             | 0.56–2.08        | 0.811        | 1.15        | 0.49–2.72        | 0.752        | 1.06         | 0.71–1.57        | 0.773            | <b>1.88</b> | <b>1.05–3.37</b> | <b>0.033</b>     |
| ER–status (pos vs neg)          | <b>1.96</b>      | <b>1.02–3.78</b> | <b>0.044</b> | 1.46        | 0.63–3.41        | 0.378        | 0.69         | 0.47–1.02        | 0.061            | <b>0.52</b> | <b>0.30–0.90</b> | <b>0.019</b>     |
| <b>model F</b>                  |                  |                  |              |             |                  |              |              |                  |                  |             |                  |                  |
| Age (<45 vs ≥45)                | 0.90             | 0.36–2.24        | 0.828        | 1.19        | 0.32–4.37        | 0.795        | <b>2.73</b>  | <b>1.47–5.09</b> | <b>0.002</b>     | 2.21        | 0.96–5.09        | 0.064            |
| Menopausal status (post vs pre) | 0.94             | 0.31–2.87        | 0.913        | 0.51        | 0.12–2.28        | 0.381        | 0.78         | 0.36–1.65        | 0.510            | 0.77        | 0.28–2.15        | 0.624            |
| Tumor stage (III vs I–II)       | <b>1.94</b>      | <b>1.01–3.69</b> | <b>0.045</b> | <b>2.50</b> | <b>1.11–5.65</b> | <b>0.027</b> | <b>3.10</b>  | <b>2.07–4.63</b> | <b>0.000</b>     | <b>2.82</b> | <b>1.62–4.90</b> | <b>&lt;0.001</b> |
| Tumor grade (3 vs 1–2)          | 1.09             | 0.57–2.08        | 0.794        | 1.19        | 0.51–2.79        | 0.691        | 1.06         | 0.71–1.57        | 0.782            | <b>1.90</b> | <b>1.06–3.40</b> | <b>0.031</b>     |
| ER–status (pos vs neg)          | <b>1.96</b>      | <b>1.02–3.77</b> | <b>0.045</b> | 1.50        | 0.64–3.49        | 0.352        | <b>0.66</b>  | <b>0.45–0.98</b> | <b>0.038</b>     | <b>0.51</b> | <b>0.29–0.87</b> | <b>0.015</b>     |

Please add footnote here to explain the bold text in the table.

**Table S6.** The indication criteria for genetic testing of hereditary BC/OC predisposition in the Czech Republic.

| <b>Familial Indication Criteria (IC):</b>                                                                                                                                                                                                                                                                                                                                                                                                                                                                                                                                                                              |
|------------------------------------------------------------------------------------------------------------------------------------------------------------------------------------------------------------------------------------------------------------------------------------------------------------------------------------------------------------------------------------------------------------------------------------------------------------------------------------------------------------------------------------------------------------------------------------------------------------------------|
| <ul style="list-style-type: none"> <li>• ≥ 3 first and/or second-degree relatives with BC (including the proband)</li> <li>• 2 first and/or second-degree relatives with BC (1 diagnosed at ≤ 50 years, or both diagnosed at ≤ 60 years, or one with male BC; including the proband)</li> <li>• BC and OC in first and/or second-degree relatives (including the proband), or BC ≤ 50 years and PaC (including the proband)</li> <li>• ≥ 2 first and/or second-degree relatives with OC and PaC (including the proband)</li> <li>• ≥ 2 first and/or second-degree relatives with OC (including the proband)</li> </ul> |
| <b>Personal (Individual) Indication Criteria:</b>                                                                                                                                                                                                                                                                                                                                                                                                                                                                                                                                                                      |
| <ul style="list-style-type: none"> <li>• BC diagnosed at ≤ 45 years (or at ≤ 50 years, when family history is unknown or limited) <ul style="list-style-type: none"> <li>• BC duplicity (first cancer diagnosed at ≤ 50 years or both cancers at ≤ 60 years) <ul style="list-style-type: none"> <li>• “Triple negative” BC diagnosed at ≤ 60 years <ul style="list-style-type: none"> <li>• Medullary BC</li> <li>• Male BC</li> </ul> </li> <li>• Duplicity of BC and OC</li> <li>• Duplicity of BC and PaC</li> <li>• OC at any age</li> </ul> </li> </ul> </li> </ul>                                               |

BC – breast cancer; OC – ovarian cancer (including the fallopian tube and primary peritoneal cancer); PaC – pancreatic cancer; close blood relatives include first-, second-, and/or third-degree relatives from the same family side. *Note:* The Czech national guidelines are based on NCCN guidelines ([www.nccn.org](http://www.nccn.org)) and since 2003 updated by the consensus of the expert panel constituted from the members of Czech Society for Oncology ([www.linkos.cz](http://www.linkos.cz)) and Society of Medical Genetics and Genomics ([www.slg.cz](http://www.slg.cz)) [1–5]. The guidelines used for the enrollment of high-risk patients before 2003 were described by Pohlreich et al. [6,7].

## Reference

- Bartonkova, H.; Foretová, L.; Helmichová, E.; Kalábová, R.; Kleibl, Z.; Konopásek, B.; Krutílková, V.; Machackova, E.; Novotny, J.; Petráková, K. Recommendations for care of patients with breast and ovarian cancer and healthy individuals with germline mutations in BRCA1 or BRCA2. *Klin. Onkol.* **2003**, *16*, 28–34.
- Plevová, P.; Novotný, J.; Petráková, K.; Palácová, M.; Kalábová, R.; Schneiderová, M.; Foretová, L.; Hereditary Breast and Ovarian Cancer Syndrome. *Klin. Onkol.* **2009**, *22*, 8–11.
- Pohlreich, P.; Kleibl, Z.; Kleiblová, P.; Janatová, M.; Soukupová, J.; Macháčková, E.; Házová, J.; Vašíčková, P.; Sťahlová, H.E.; Navrátilová, M.; et al. The Clinical Importance of a Genetic Analysis of Moderate-Risk Cancer Susceptibility Genes in Breast and Other Cancer Patients from the Czech Republic. *Klin. Onkol.* **2012**, *25 Suppl 1*, S59–S66.
- Janatova, M.; Borecka, M.; Soukupova, J.; Kleiblova, P.; Stribrna, J.; Vocka, M.; Zemánková, P.; Panczak, A.; Veselá, K.; Souček, P.; et al. PALB2 as Another Candidate Gene for Genetic Testing in Patients with Hereditary Breast Cancer in Czech Republic. *Klin. Onkol.* **2016**, *29 Suppl 1*, 31–34.
- Foretova, L.; Machackova, E.; Palacova, M.; Navratilova, M.; Svoboda, M.; Petrakova, K. Recommended Extension of Indication Criteria for Genetic Testing of BRCA1 and BRCA2 Mutations in Hereditary Breast and Ovarian Cancer Syndrome. *Klin. Onkol.* **2016**, *29 Suppl 1*, S9–S13.
- Pohlreich, P.; Stribrna, J.; Kleibl, Z.; Zikan, M.; Kalbacova, R.; Petruzelka, L.; Konopasek, B. Mutations of the BRCA1 gene in hereditary breast and ovarian cancer in the Czech Republic. *Med. Princ. Pract.* **2003**, *12*, 23–29.
- Pohlreich, P.; Stribrna, J.; Zikan, M.; Kleibl, Z.; Matous, B.; Novotny, J. Analysis of BRCA1 and BRCA2 mutations in high-risk patients from the Prague-area. *Eur. J. Cancer Suppl.* **2005**, *3*, 89.

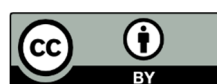

© 2019 by the authors. Submitted for possible open access publication under the terms and conditions of the Creative Commons Attribution (CC BY) license (<http://creativecommons.org/licenses/by/4.0/>).
